# Supplementary material
Source: publisher site journal article supplement (https://www.dovepress.com/article/589576)
Supplement: Supplementary file 1 [file 589576%20Revised%20Supplementary%20Materials.docx]

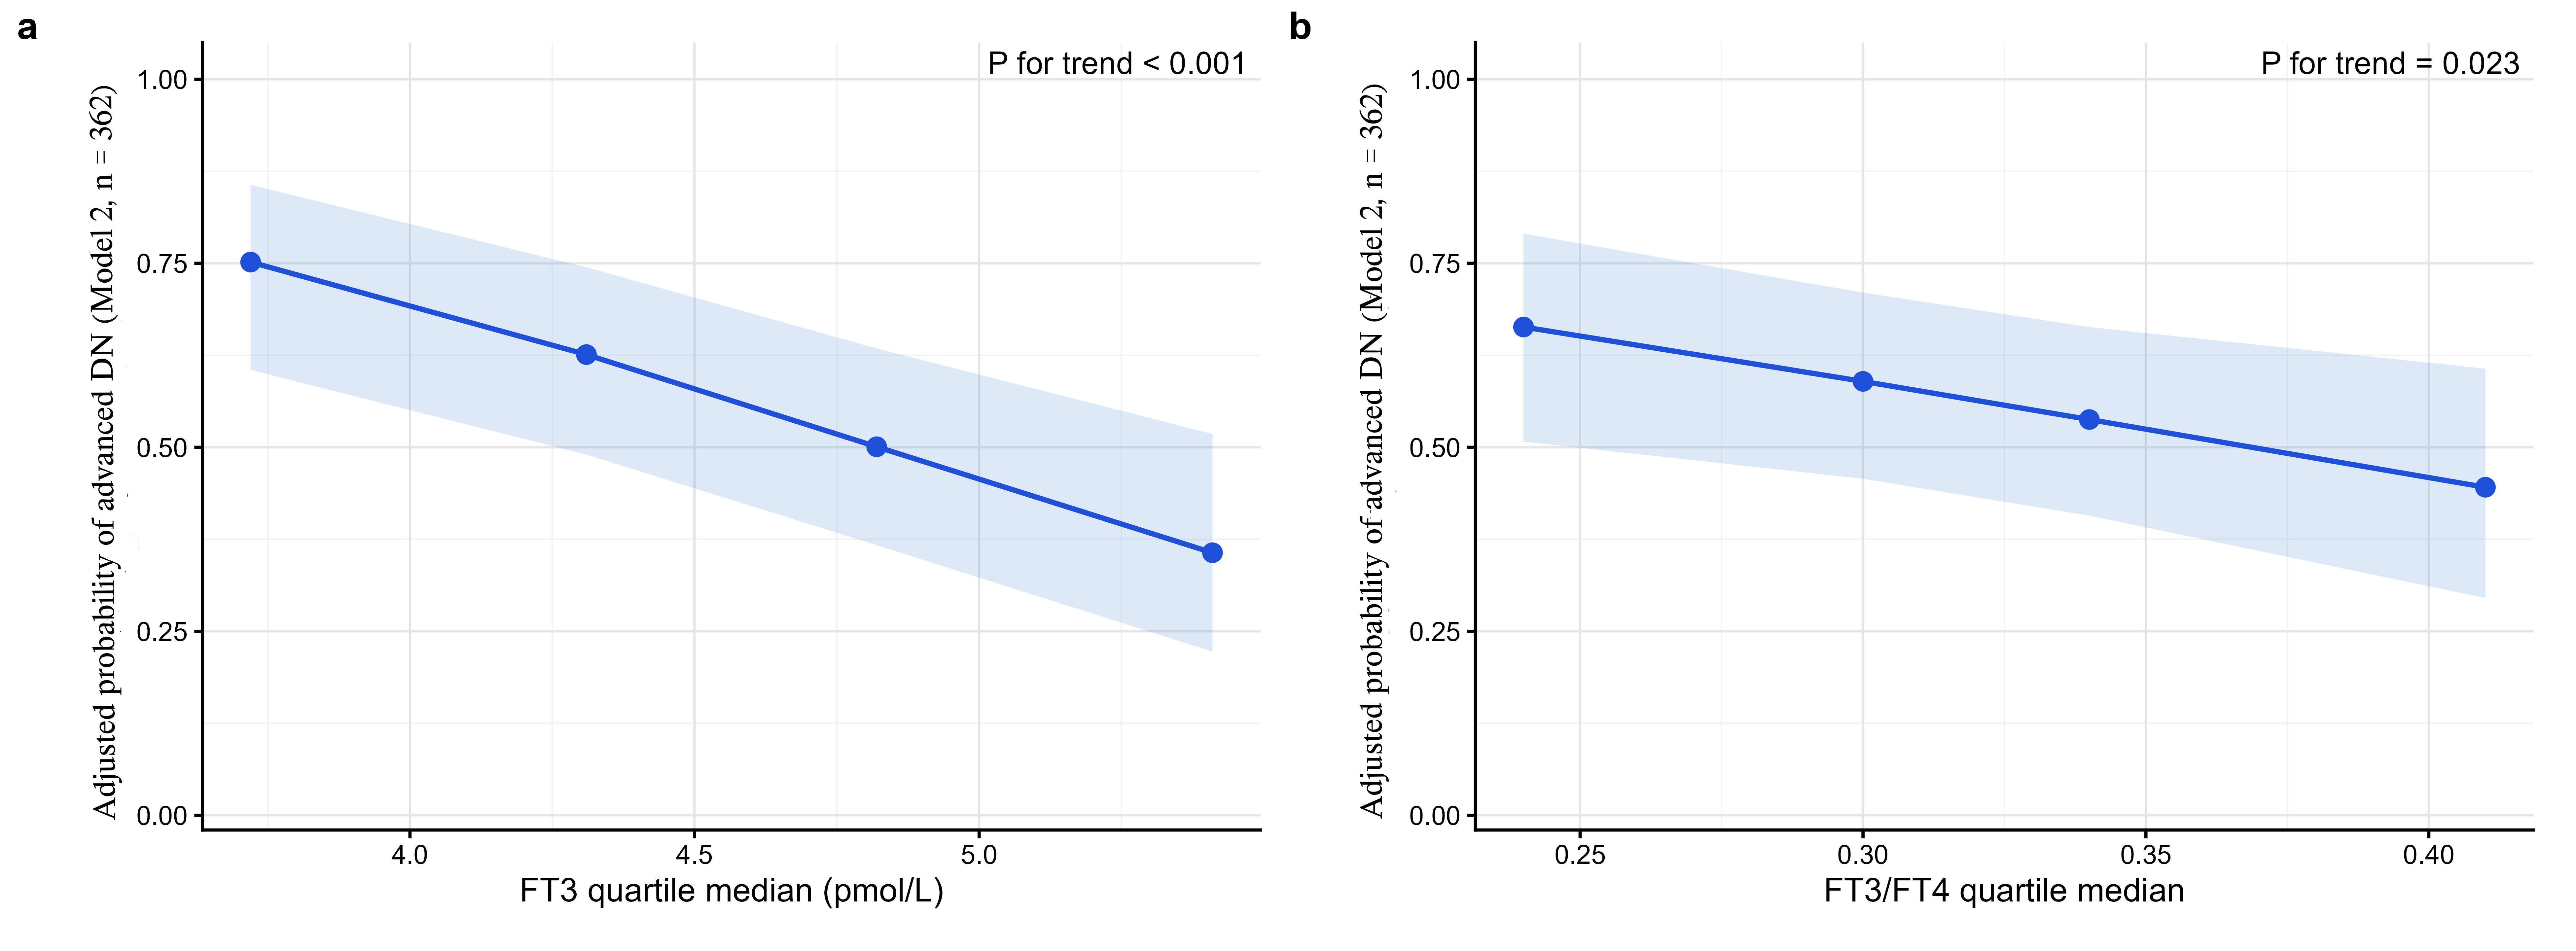


**Supplementary Figure S1.** Linear Trends in the Probability of Advanced DN Across FT3 and FT3/FT4 Ratio Quartiles.

1. Association between FT3 quartiles and the probability of advanced DN.
2. Association between FT3/FT4 ratio quartiles and the probability of advanced DN.

**Notes:** Curves were derived from the fully adjusted multivariable logistic regression model (Model 2; n = 362). Shaded areas represent the 95% confidence intervals of the estimated probabilities.


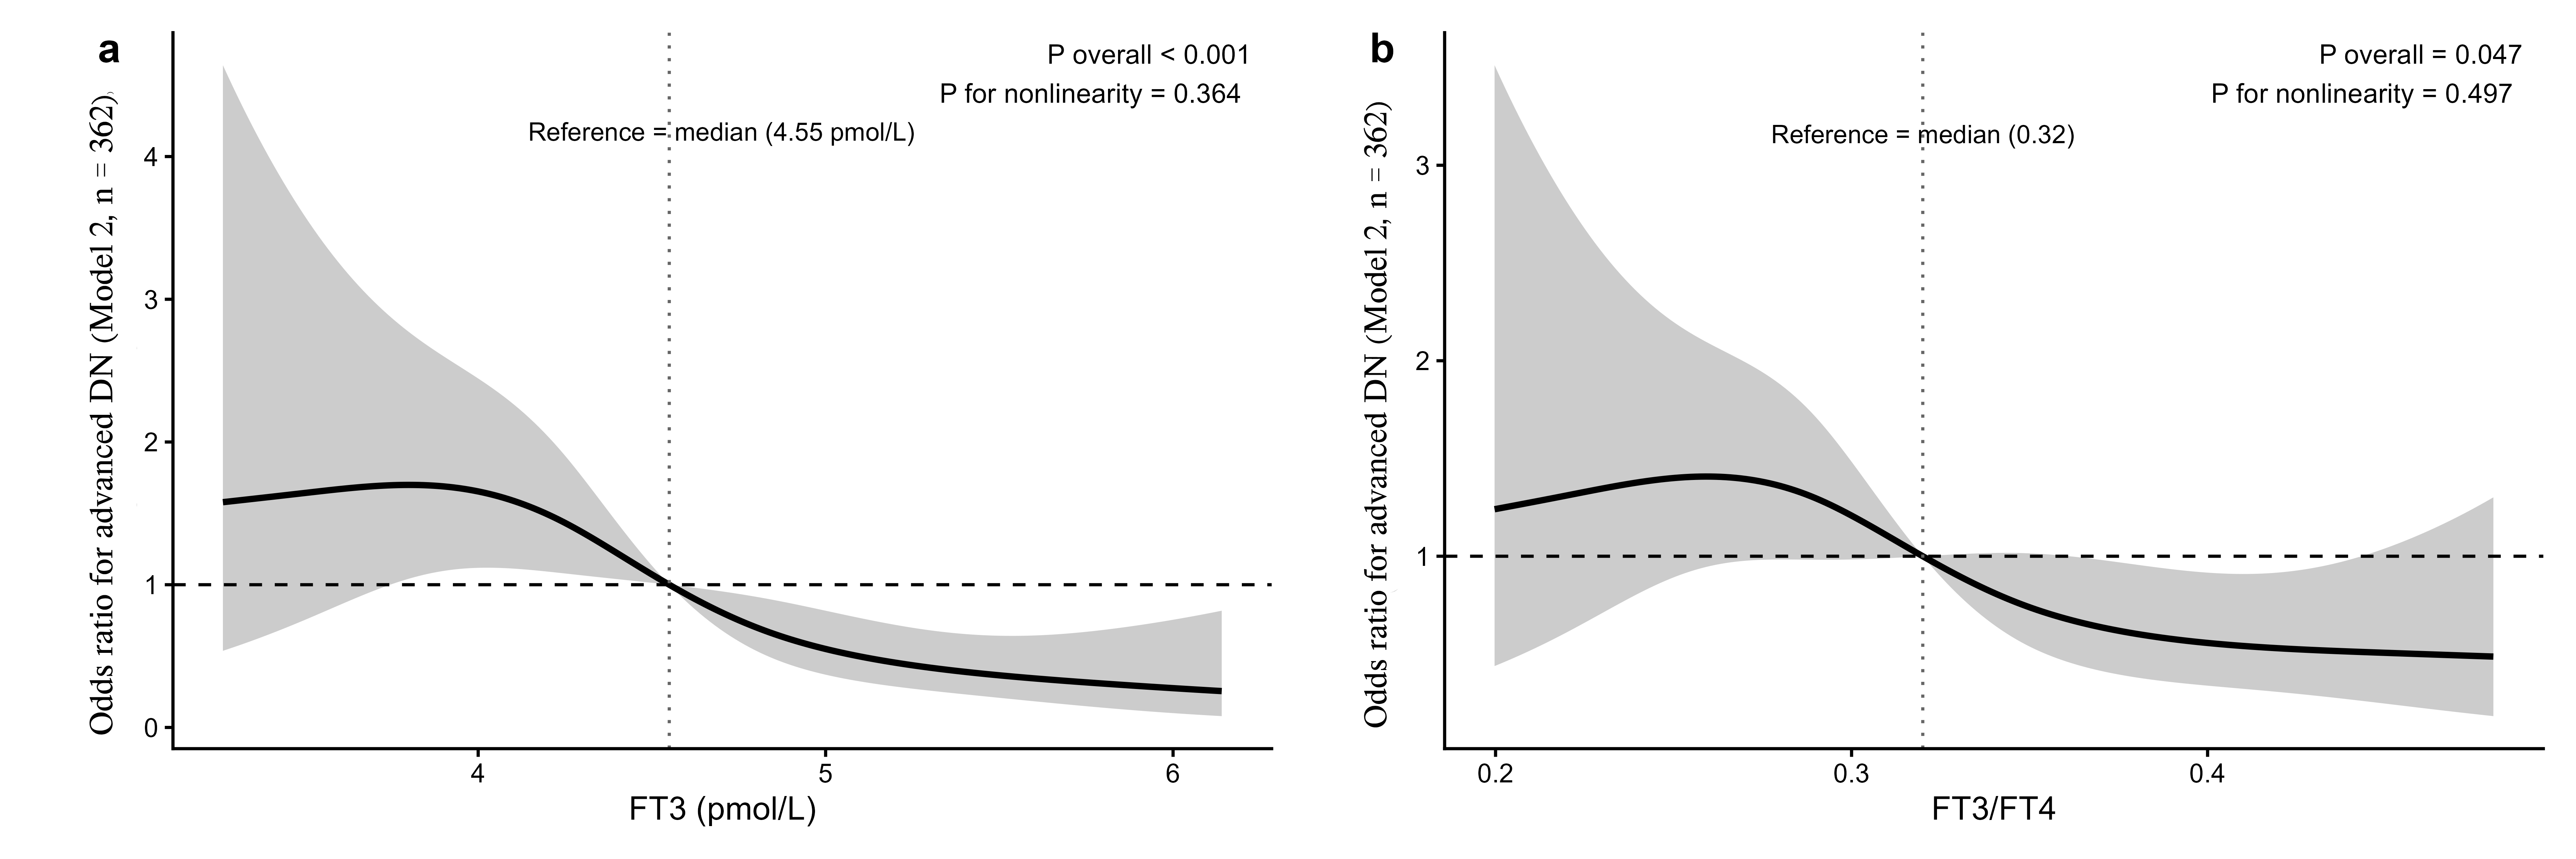


**Supplementary Figure S2.** Dose–response relationships of FT3 and FT3/FT4 ratio with the risk of advanced DN.

**Notes:** Restricted cubic spline curves illustrating the adjusted associations of FT3 and FT3/FT4 ratio with advanced DN based on the fully adjusted multivariable model (Model 2, n=362). Shaded areas represent 95% confidence intervals. The reference value was set at the median level of FT3 or FT3/FT4 ratio, corresponding to an odds ratio of 1.0.

**
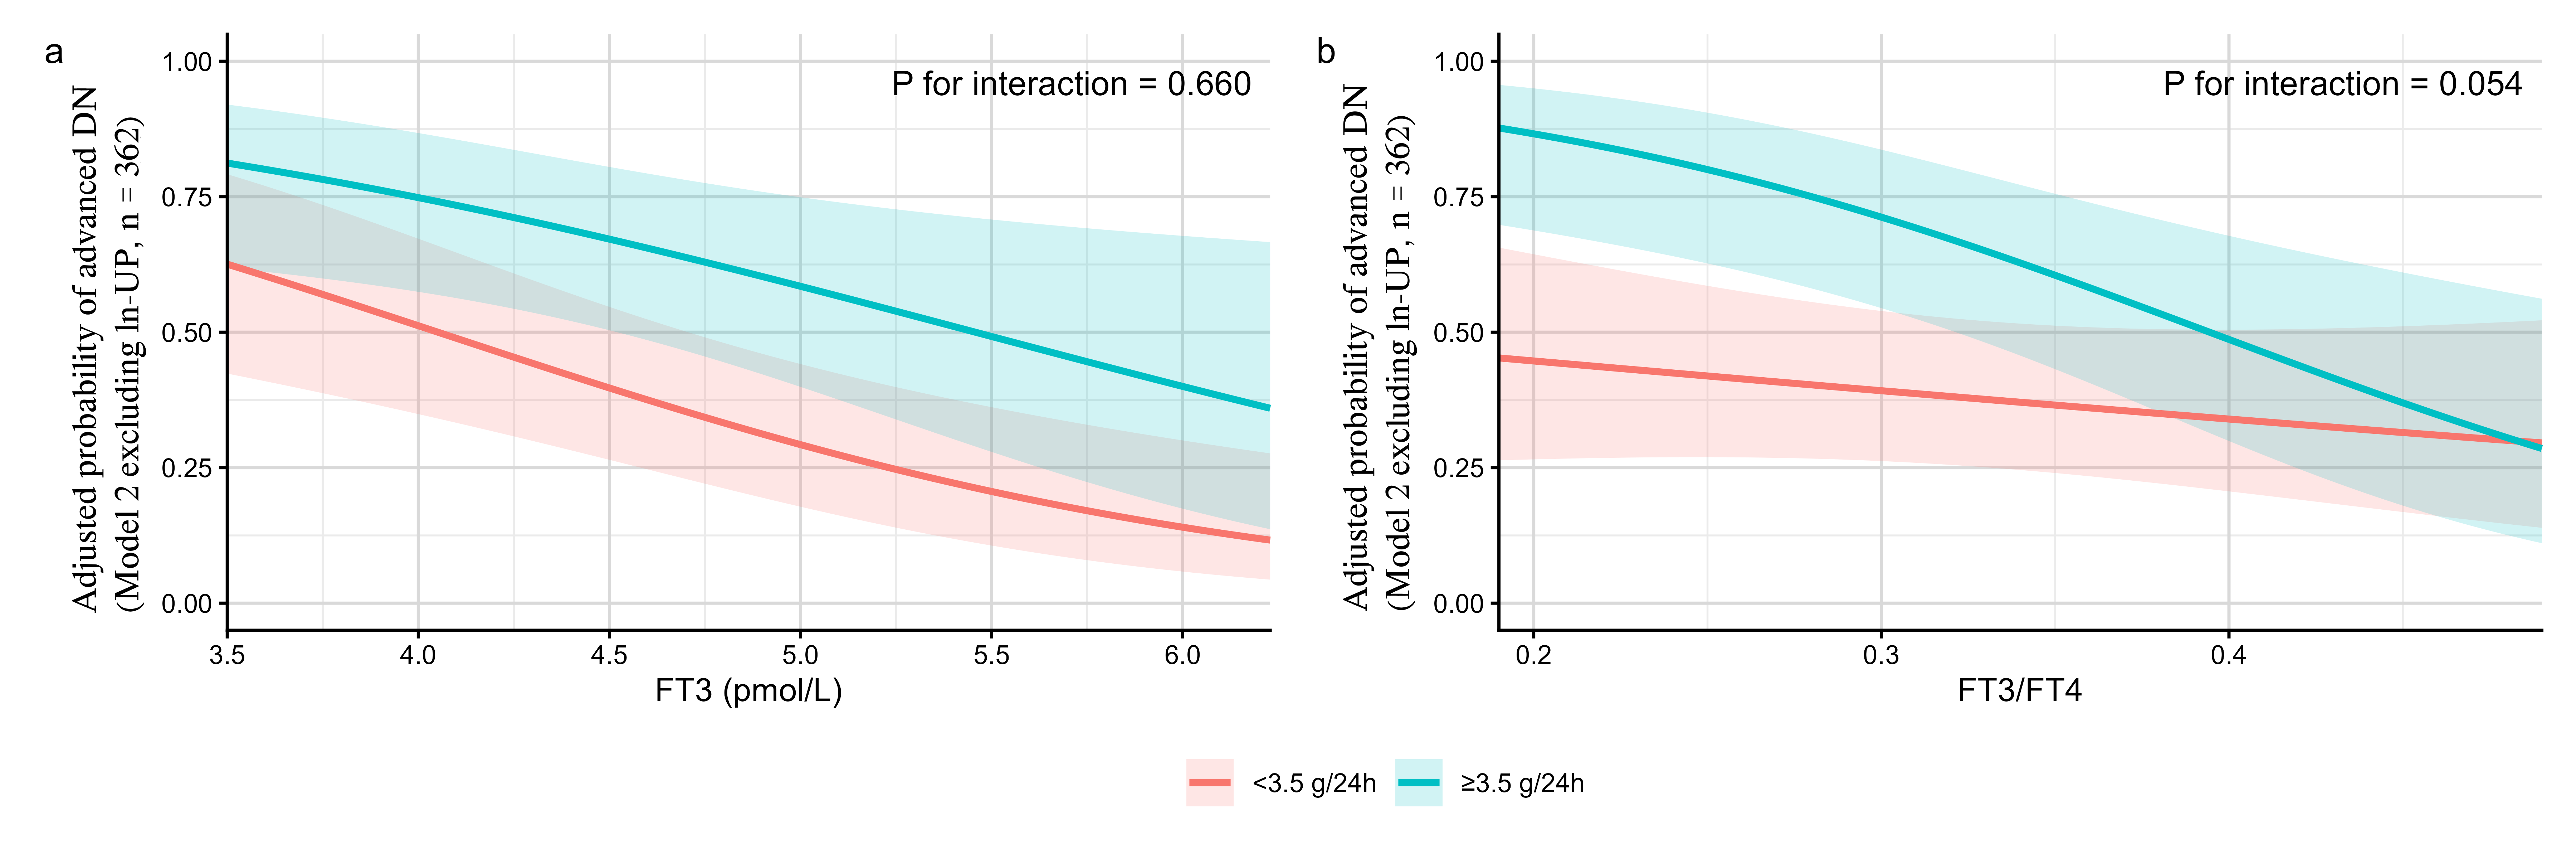
**

**Supplementary Figure S3**. Effect of FT3 and FT3/FT4 Ratio on Advanced DN Risk: Modification by Proteinuria Status.

1. Effect modification by proteinuria on the association between FT3 and advanced DN.
2. Effect modification by proteinuria on the association between the FT3/FT4 ratio and advanced DN.

**Notes:** Patients were stratified into low (< 3.5 g/24h) and high (≥ 3.5 g/24h) proteinuria groups based on 24-hour urinary protein excretion. The shaded areas represent the 95% confidence intervals.

**Supplementary Table S1** Basic pathological criteria from the Renal Pathology Society classification

| **Lesion** | **Criteria** | **Class/Score** |
| --- | --- | --- |
| Glomerular classification | Mild or nonspecific LM changes and  EM-proven GBM thickening | Ⅰ |
|  | Mild mesangial expansion | Ⅱa |
|  | Severe mesangial expansion | Ⅱb |
|  | Nodular sclerosis  (Kimmelstiel–Wilson lesion) | Ⅲ |
|  | Advanced diabetic  glomerulosclerosis | Ⅳ |
| Interstitial fibrosis and  tubular atrophy  (IFTA) | No IFTA | 0 |
|  | <25% | 1 |
|  | 25% to 50% | 2 |
|  | >50% | 3 |
| Interstitial inflammation | Absent | 0 |
|  | Infiltration only in relation to IFTA | 1 |
|  | Infiltration in areas without IFTA | 2 |
| Vascular lesions |  |  |
| arteriolar hyalinosis | Absent | 0 |
|  | At least one area of arteriolar hyalinosis | 1 |
|  | More than one area of arteriolar hyalinosis | 2 |
| arteriosclerosis (score  worst artery) | No intimal thickening | 0 |
|  | Intimal thickening less than thickness of media | 1 |
|  | Intimal thickening greater than thickness of media | 2 |

**Note:** Arteriolar hyalinosis and arteriosclerosis were graded separately on a scale of 0–2. A composite vascular lesion score (range 0–4) was calculated by summing the two scores for statistical analysis.

**Abbreviations:** LM, light microscopy; EM, electron microscopy; GBM, glomerular basement membrane.

**Supplementary Table S2** Association of FT3 Quartiles with Renal Pathological Features in Patients with DN

| **Variable** | **Q1 (n=91) ≤4.09** | **Q2 (n=90) 4.10–4.55** | **Q3 (n=90) 4.56–5.06** | **Q4 (n=91) ≥5.07** | ***P*** |
| --- | --- | --- | --- | --- | --- |
| Glomerular lesion classification |  |  |  |  | < 0.001 |
| Class I/II DN, n (%) | 23 (25.3) | 28 (31.1) | 35 (38.9) | 57 (62.6) |  |
| Class III/IV DN, n (%) | 68 (74.7) | 62 (68.9) | 55 (61.1) | 34 (37.4) |  |
| Global glomerulosclerosis (%) | 24.6 (14.3, 37.5) | 23.4 (10.0, 38.2) | 17.0 (8.9, 43.4) | 14.3 (6.7, 32.0) | 0.012 |
| Tubular atrophy, n (%) |  |  |  |  | 0.047 |
| 0/1 | 29 (31.9) | 29 (32.2) | 34 (37.8) | 47 (51.6) |  |
| 2 | 49 (53.8) | 46 (51.1) | 45 (50.0) | 29 (31.9) |  |
| 3 | 13 (14.3) | 15 (16.7) | 11 (12.2) | 15 (16.5) |  |
| Interstitial inflammation, n (%) |  |  |  |  | 0.499 |
| 0/1 | 68 (74.7) | 66 (73.3) | 66 (73.3) | 70 (76.9) |  |
| 2 | 23 (25.3) | 24 (26.7) | 24 (26.7) | 21 (23.1) |  |
| Vascular lesion scores, n (%) |  |  |  |  | < 0.001 |
| 0/1 | 17 (18.7) | 15 (16.7) | 37 (41.1) | 39 (42.9) |  |
| 2 | 35 (38.5) | 44 (48.9) | 30 (33.3) | 40 (44.0) |  |
| 3/4 | 39 (42.9) | 31 (34.5) | 23 (25.6) | 12 (13.2) |  |

Note: Values are presented as n (%) or median (interquartile range, IQR).

**Supplementary Table S3** Association of FT3/FT4 ratio Quartiles with Renal Pathological Features in Patients with DN

| **Variable** | **Q1 (n=102) ≤0.27** | **Q2 (n=94) 0.28–0.32** | **Q3 (n=83) 0.33–0.37** | **Q4 (n=83) ≥0.38** | ***P*** |
| --- | --- | --- | --- | --- | --- |
| Glomerular lesion classification |  |  |  |  | 0.041 |
| Class I/II DN, n (%) | 32 (31.4) | 37 (39.4) | 31 (37.3) | 43 (51.8) |  |
| Class III/IV DN, n (%) | 70 (68.6) | 57 (60.6) | 52 (62.7) | 40 (48.2) |  |
| Global glomerulosclerosis (%) | 25.0 (10.0, 41.9) | 20.0 (10.0, 33.4) | 20.0 (10.0, 46.7) | 15.4 (7.0, 34.6) | 0.061 |
| Tubular atrophy, n (%) |  |  |  |  | 0.443 |
| 0/1 | 32 (31.4) | 37 (39.4) | 33 (39.8) | 37 (44.6) |  |
| 2 | 55 (53.9) | 45 (47.9) | 34 (40.9) | 35 (42.2) |  |
| 3 | 15 (14.7) | 12 (12.8) | 16 (19.3) | 11 (13.3) |  |
| Interstitial inflammation, n (%) |  |  |  |  | 0.028 |
| 0/1 | 72 (70.6) | 76 (80.9) | 54 (65.1) | 68 (81.9) |  |
| 2 | 30 (29.4) | 18 (19.1) | 29 (34.9) | 15 (18.1) |  |
| Vascular lesion scores, n (%) |  |  |  |  | 0.032 |
| 0/1 | 22 (21.6) | 22 (23.4) | 33 (39.8) | 17 (20.5) |  |
| 2 | 45 (44.1) | 36 (38.3) | 30 (36.1) | 38 (45.8) |  |
| 3/4 | 35 (34.3) | 36 (38.3) | 20 (24.1) | 28 (33.7) |  |

Note: Values are presented as n (%) or median (interquartile range, IQR).

**Supplementary Table S4** Association of FT3 and FT3/FT4 ratio with renal pathological classes in ordinal logistic regression models.

| **Variable** | **FT3 (pmol/L) OR (95% CI)** | ***P*** | **FT3/FT4 (per 0.1 increase) OR (95% CI)** | ***P*** |
| --- | --- | --- | --- | --- |
| Model 1 | 0.546 (0.417–0.715) | <0.001 | 0.691 (0.531–0.897) | 0.006 |
| Model 2 | 0.574 (0.423–0.779) | <0.001 | 0.670 (0.506–0.888) | 0.005 |

**Notes**: Ordinal logistic regression analyses adjusted according to Models 1 and 2. FT3/FT4 ratio was scaled per 0.1-unit increase in regression models.

**Supplementary Table S5** Sensitivity analyses of the associations of FT3 and FT3/FT4 ratio with advanced DN.

| **Variable** | **FT3 (pmol/L) OR (95% CI)** | ***P*** | **FT3/FT4 (per 0.1 increase) OR (95% CI)** | ***P*** |
| --- | --- | --- | --- | --- |
| Model 2 | 0.443 (0.294–0.667) | <0.001 | 0.607 (0.416–0.886) | 0.010 |
| Model 3 | 0.504 (0.329–0.775) | 0.002 | 0.636 (0.424–0.953) | 0.028 |
| Model 4 | 0.519 (0.332–0.813) | 0.004 | 0.666 (0.439–1.011) | 0.056 |

**Notes:** Multivariable logistic regression analyses adjusted according to Models 2, 3, and 4.

FT3/FT4 ratio was scaled per 0.1-unit increase in regression models.
